# Supplementary material for: Associations Between Health-promoting and Health-risk Behaviors Among Montana High School Students: A 10-Year Analysis Using YRBSS Data
Source: Research Square preprint supplement (doi:10.21203/rs.3.rs-6833274/v1), 2025-07-15
Supplement: Supplementary file 1 [file 8dbf6a532a2b7c8a2e4e34a7.docx]

**Appendix A1:** Complete Wording of YBRSS Questions Included in Analyses (2013-2023)

## Behavioral Questions (2013–2023)

- Currently smoked cigarettes frequently (20 or more days during the 30 days before the survey)
- Currently drank alcohol (At least one drink of alcohol, on at least 1 day during the 30 days before the survey)
- Currently used marijuana (Also called pot or weed, one or more times during the 30 days before the survey)
- Ever used methamphetamines ("also called speed, crystal meth, crank, ice, or meth," one or more times during their life)
- Ever injected any illegal drug (Used a needle to inject any illegal drug into their body, one or more times during their life)
- Described themselves as having self-perceived weight concerns
- Were physically active at least 60 minutes per day on 5 or more days (during the 7 days before the survey)

## Behavioral Questions (2015–2023)

- Currently used electronic vapor products frequently (Including e-cigarettes, vapes, vape pens, e-cigars, e-hookahs, hookah pens, and mods, such as JUUL, NJOY, PuffBar, Vuse, blu, or Bidi Stick, on 20 or more days during the 30 days before the survey)

## Behavioral Questions Used for Trend Line Graphs

### Diet

- Did not eat breakfast during the 7 days before this survey
- Did not eat vegetables (green salad, potatoes excluding French fries, fried potatoes, or potato chips, carrots, or other vegetables, during the 7 days before the survey)

Sleep

- Did not get 8 or more hours of sleep on an average school night

**Appendix A2:** Complete Pairwise Comparison Results Between Health Behaviors by Biological Sex (YBRSS 2023)

| Health-Risk Behavior | Health-Promoting Behavior | Biological Sex | Yes/Yes (n) | Yes/No (n) | No/Yes (n) | No/No (n) | p-value |
| --- | --- | --- | --- | --- | --- | --- | --- |
| Smokes frequently | Inactive ≥5 days | Female | 8 | 11 | 926 | 694 | 0.1892 |
| Smokes frequently | Inactive ≥5 days | Male | 15 | 8 | 710 | 1047 | **0.0068** |
|  | Sleep > 8 hours | Female | 16 | 3 | 1234 | 366 | 0.1684 |
|  | Sleep > 8 hours | Male | 18 | 4 | 1207 | 531 | 0.4928 |
|  | Eaten breakfast >7 days | Female | 16 | 1 | 1271 | 341 | **0.0448** |
|  | Eaten breakfast >7 days | Male | 18 | 5 | 1226 | 525 | 0.7591 |
|  | No Veggies | Female | 1 | 18 | 93 | 1517 | 0.9489 |
|  | No Veggies | Male | 2 | 20 | 153 | 1592 | 0.792 |
|  |  |  |  |  |  |  |  |
| Vapes frequently | Inactive ≥5 days | Female | 154 | 79 | 727 | 604 | **0.0053** |
| Vapes frequently | Inactive ≥5 days | Male | 76 | 94 | 617 | 920 | **0.0353** |
|  | Sleep > 8 hours | Female | 203 | 30 | 987 | 324 | **0.0000** |
|  | Sleep > 8 hours | Male | 139 | 29 | 1038 | 481 | **0.0000** |
|  | Eaten breakfast >7 days | Female | 212 | 19 | 1008 | 316 | **0.0000** |
|  | Eaten breakfast > 7 days | Male | 147 | 23 | 1045 | 486 | **0.0000** |
|  | No Veggies | Female | 14 | 215 | 76 | 1252 | 0.8906 |
|  | No Veggies | Male | 13 | 158 | 132 | 1391 | 0.9176 |
|  |  |  |  |  |  |  |  |
| Currently drinks | Inactive ≥5 days | Female | 279 | 176 | 623 | 515 | **0.0244** |
| Currently drinks | Inactive ≥5 days | Male | 152 | 245 | 555 | 767 | 0.2627 |
|  | Sleep > 8 hours | Female | 383 | 68 | 831 | 291 | **0.0000** |
|  | Sleep > 8 hours | Male | 306 | 86 | 877 | 429 | **0.0000** |
|  | Eaten breakfast >7 days | Female | 392 | 59 | 863 | 271 | **0.0000** |
|  | Eaten breakfast > 7 days | Male | 309 | 89 | 888 | 430 | **0.0025** |
|  | No Veggies | Female | 20 | 431 | 71 | 1061 | 0.3431 |
|  | No Veggies | Male | 31 | 364 | 122 | 1187 | 0.7251 |
|  |  |  |  |  |  |  |  |
| Currently used marijuana | Inactive ≥5 days | Female | 243 | 136 | 703 | 578 | **0.0061** |
| Currently used marijuana | Inactive ≥5 days | Male | 147 | 194 | 591 | 877 | 0.2744 |
|  | Sleep > 8 hours | Female | 321 | 54 | 945 | 319 | **0.0001** |
|  | Sleep > 8 hours | Male | 263 | 72 | 984 | 469 | **0.0001** |
|  | Eaten breakfast >7 days | Female | 342 | 34 | 962 | 313 | **0.0000** |
|  | Eaten breakfast > 7 days | Male | 285 | 58 | 979 | 481 | **0.0000** |
|  | No Veggies | Female | 24 | 351 | 73 | 1203 | 0.6165 |
|  | No Veggies | Male | 27 | 314 | 129 | 1323 | 0.7949 |
|  |  |  |  |  |  |  |  |
| Ever used methamphetamines | Inactive ≥5 days | Female | 24 | 5 | 1257 | 369 | **0.0385** |
| Ever used methamphetamines | Inactive ≥5 days | Male | 47 | 14 | 1182 | 566 | **0.0327** |
|  | Sleep > 8 hours | Female | 26 | 3 | 1250 | 370 | **0.0205** |
|  | Sleep > 8 hours | Male | 52 | 13 | 1215 | 529 | **0.0196** |
|  | Eaten breakfast >7 days | Female | 25 | 4 | 1288 | 343 | 0.8773 |
|  | Eaten breakfast > 7 days | Male | 57 | 10 | 1228 | 531 | **0.0002** |
|  | No Veggies | Female | 2 | 27 | 95 | 1537 | 0.9450 |
|  | No Veggies | Male | 9 | 53 | 147 | 1605 | 0.1567 |
|  |  |  |  |  |  |  |  |
| Ever injected any illegal drugs | Inactive ≥5 days | Female | 10 | 9 | 947 | 704 | 0.5878 |
| Ever injected any illegal drugs | Inactive ≥5 days | Male | 39 | 18 | 715 | 1060 | **0.0021** |
|  | Sleep > 8 hours | Female | 15 | 3 | 1261 | 370 | 0.1549 |
|  | Sleep > 8 hours | Male | 42 | 12 | 1224 | 532 | 0.5080 |
|  | Eaten breakfast >7 days | Female | 14 | 4 | 1297 | 345 | 0.7798 |
|  | Eaten breakfast > 7 days | Male | 48 | 8 | 1235 | 535 | **0.0082** |
|  | No Veggies | Female | 1 | 18 | 96 | 1545 | 0.8092 |
|  | No Veggies | Male | 8 | 47 | 151 | 1609 | 0.2894 |
|  |  |  |  |  |  |  |  |
| Self-perceived weight concerns | Inactive ≥5 days | Female | 362 | 206 | 579 | 504 | **0.0005** |
| Self-perceived weight concerns | Inactive ≥5 days | Male | 270 | 223 | 480 | 848 | **0.0000** |
|  | Sleep > 8 hours | Female | 454 | 107 | 812 | 257 | 0.0995 |
|  | Sleep > 8 hours | Male | 361 | 126 | 898 | 414 | 0.1200 |
|  | Eaten breakfast >7 days | Female | 469 | 94 | 827 | 252 | **0.0006** |
|  | Eaten breakfast > 7 days | Male | 401 | 92 | 880 | 442 | **0.0000** |
|  | No Veggies | Female | 34 | 535 | 63 | 1011 | 0.7167 |
|  | No Veggies | Male | 535 | 448 | 114 | 1198 | 0.5885 |

**Legend:** Appendix 2 presents the full results of pairwise comparisons between selected health-promoting and health-risk behaviors among Montana high school students using 2023 YRBSS data. Analyses were stratified by biological sex (female and male) to identify shared and sex-specific associations. Each row displays the frequency of students who endorsed both behaviors (Yes/Yes), only one behavior (Yes/No or No/Yes), or neither (No/No), along with the p-value from chi-square testing.

Health-promoting behaviors include physical activity (≥60 minutes/day on ≥5 days), daily breakfast consumption, adequate sleep (≥8 hours), and vegetable intake. Health-risk behaviors include frequent cigarette smoking, current alcohol use, current marijuana use, frequent e-vapor use, methamphetamine use, injection drug use, and self-perceived weight concerns. Comparisons were limited to theoretically relevant pairings, reducing the number of tests from 55 to 28 and minimizing the likelihood of spurious results.

Statistical significance was defined as p < 0.05. Results highlight patterns of behavioral clustering, such as associations between frequent vaping and sleep deprivation, or alcohol use and breakfast skipping. Findings also reveal notable sex differences in behavior combinations, including stronger associations among female students for several risk and protective behavior pairs. These insights provide a more nuanced understanding of adolescent health behavior patterns and can inform sex-specific prevention strategies in school and community settings.

**Appendix A3:** Trend Line Graphs for Health Behavior Questions in Montana Adolescents (YBRSS 2013-2023)

**Figure 3.** Trend in current alcohol use among Montana high school students, 2013–2023.
A steady decline from 36.4% in 2013 to 25.8% in 2023 reflects reduced underage drinking over the decade.

**Figure 4.** Trend in frequent cigarette smoking among Montana high school students, 2013–2023.
Smoking prevalence dropped from 5.4% in 2013 to 1.0% in 2023, suggesting successful tobacco prevention efforts.

**Figure 5.** Trend in current marijuana use among Montana high school students, 2013–2023.
Rates remained stable, hovering around 20% over the 10-year period, with minor fluctuations across survey years.

**Figure 6.** Trend in current frequent e-vapor product use among Montana high school students, 2015–2023.
Use peaked at 30.0% in 2019, followed by a decline to 24.0% in 2023, though vaping remains highly prevalent.

**Figure 7.** Trend in daily physical activity (≥60 minutes per day) among Montana high school students, 2013–2023.
Participation declined from 54.5% in 2013 to 50.7% in 2019 and has remained relatively unchanged since.

**Figure 8.** Trend in self-perceived weight concerns among Montana high school students, 2013–2023.
Perceived concerns fluctuated between 27.6% and 30.5%, indicating persistent body image issues among adolescents.

**Figure 9.** Trend in daily breakfast consumption among Montana high school students, 2013–2023.
Rates declined from over 40% in 2013 to just 26.2% in 2023, pointing to increased barriers to consistent morning nutrition.

**Adequate Sleep**

**Figure 10.** Trend in adequate sleep (≥8 hours) among Montana high school students, 2015–2023.
Adequate sleep decreased from 32.6% in 2015 to 26.8% in 2023, reflecting worsening sleep health in adolescence.

**Figure 11.** Trend in daily vegetable consumption (≥3 times/day) among Montana high school students, 2013–2023.
Vegetable intake remained low throughout the decade, decreasing slightly from 15.9% in 2013 to 14.1% in 2023.
